# Supplementary figures and images for: Different Reactivity of Raw Starch from Diverse Potato Genotypes
Source: MDPI journal article supplement (doi:10.3390/molecules26010226), 2021-01-05

Xlestkin 52-2

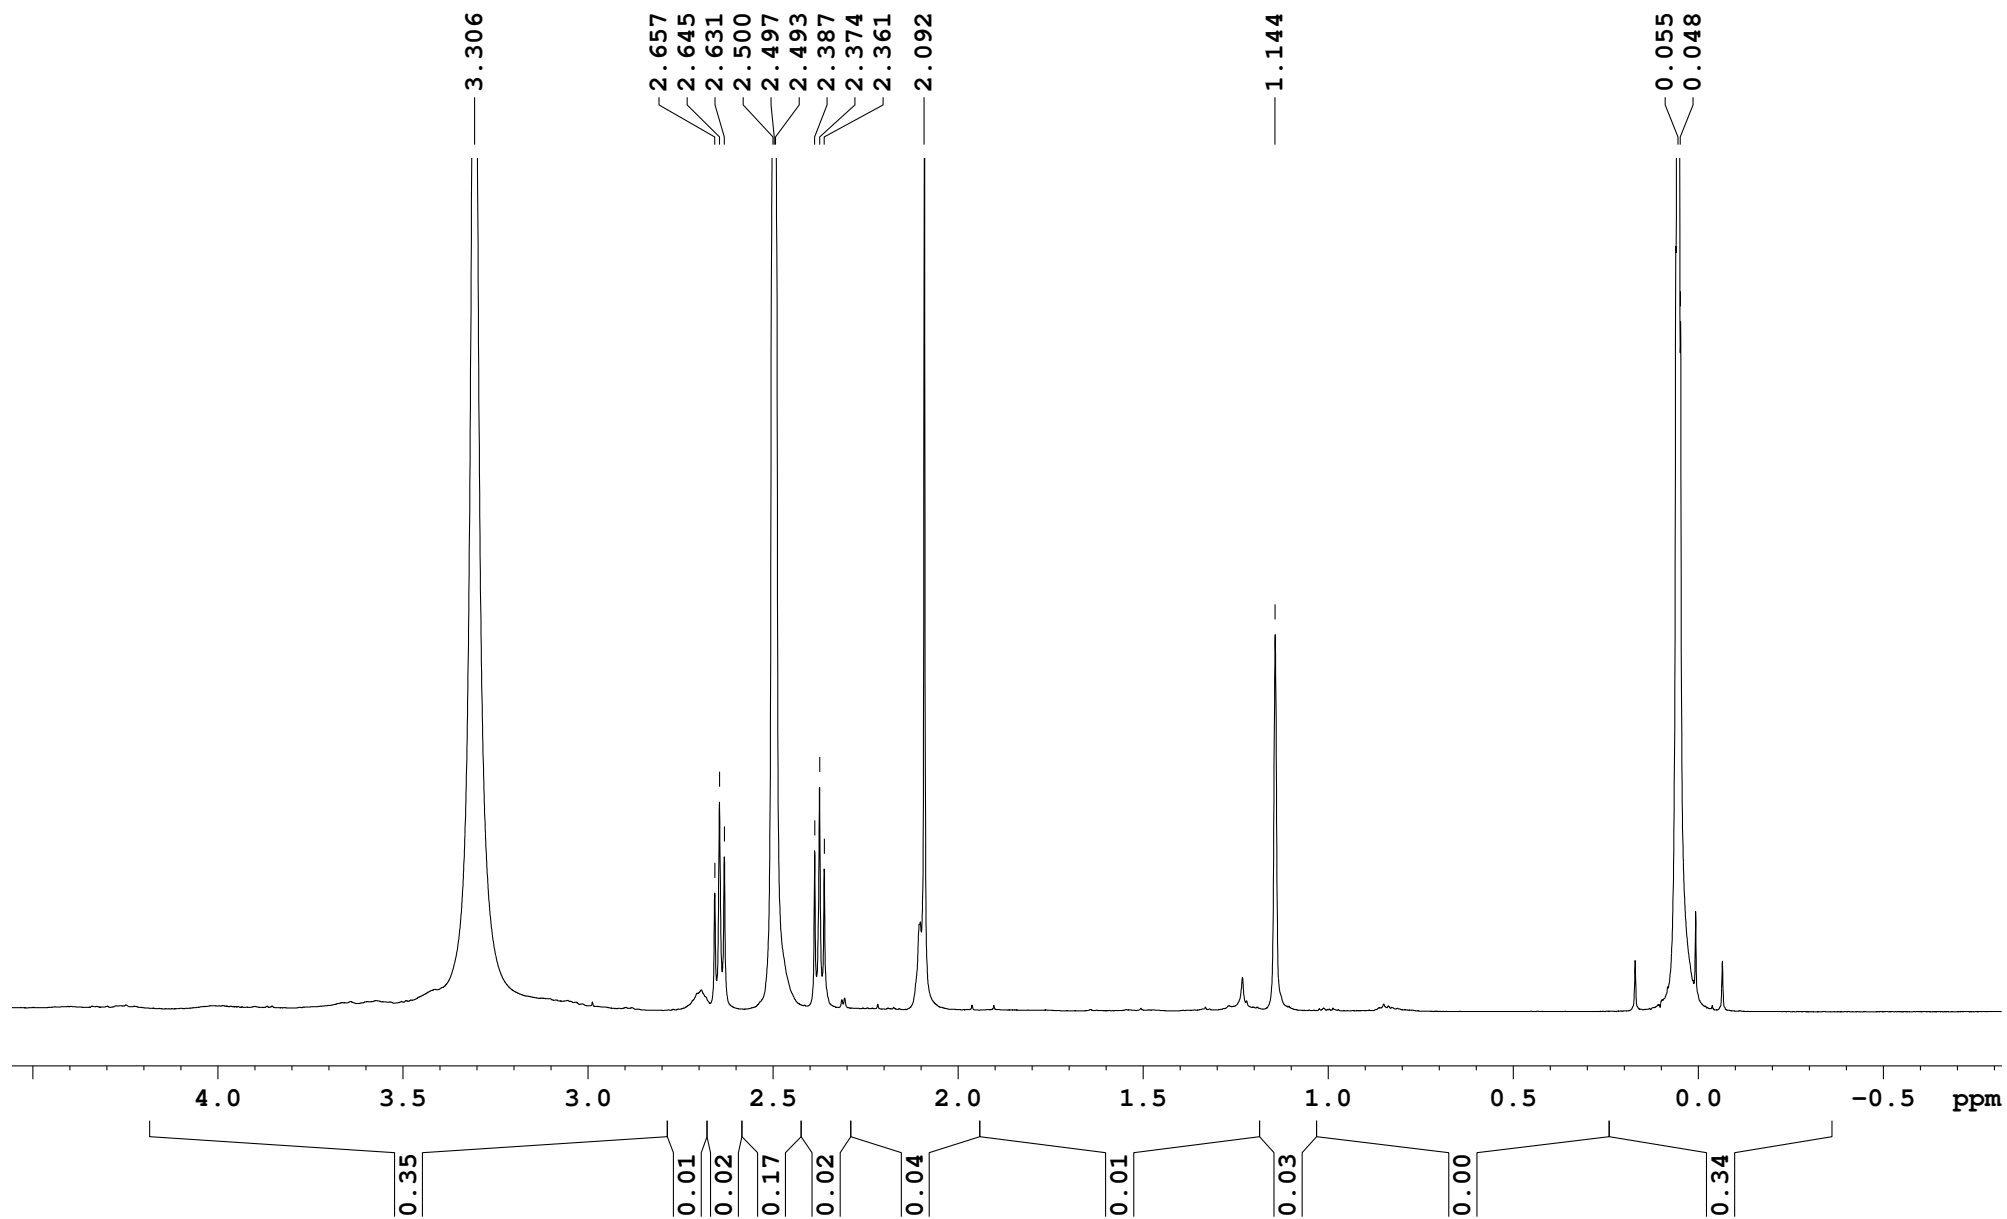

Supplement: s1 [file s1]

Xlestkin 54-2

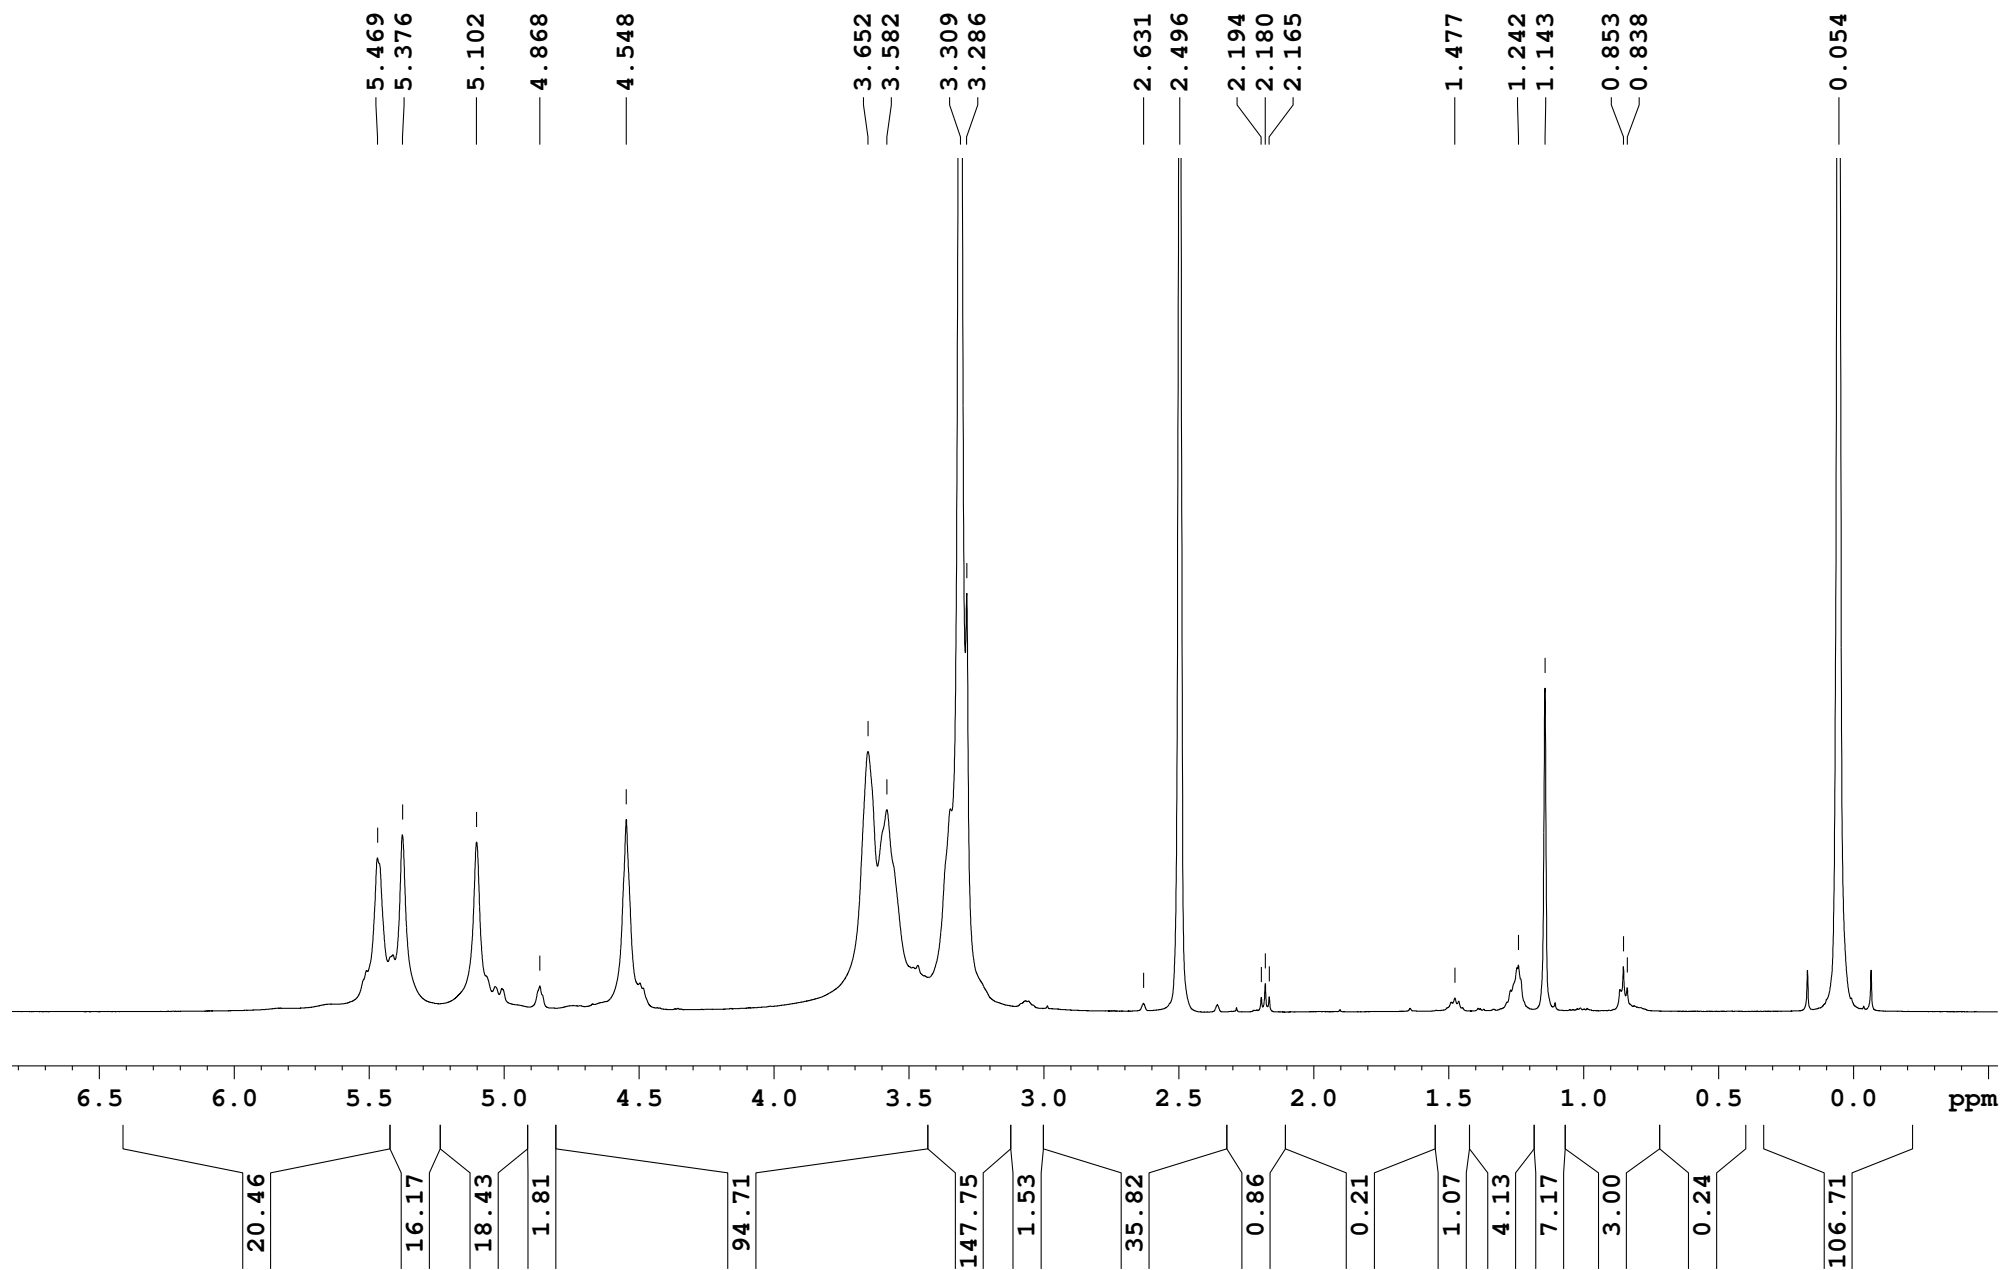

Supplement: s1 [file s1]

Xlestkin 54-1

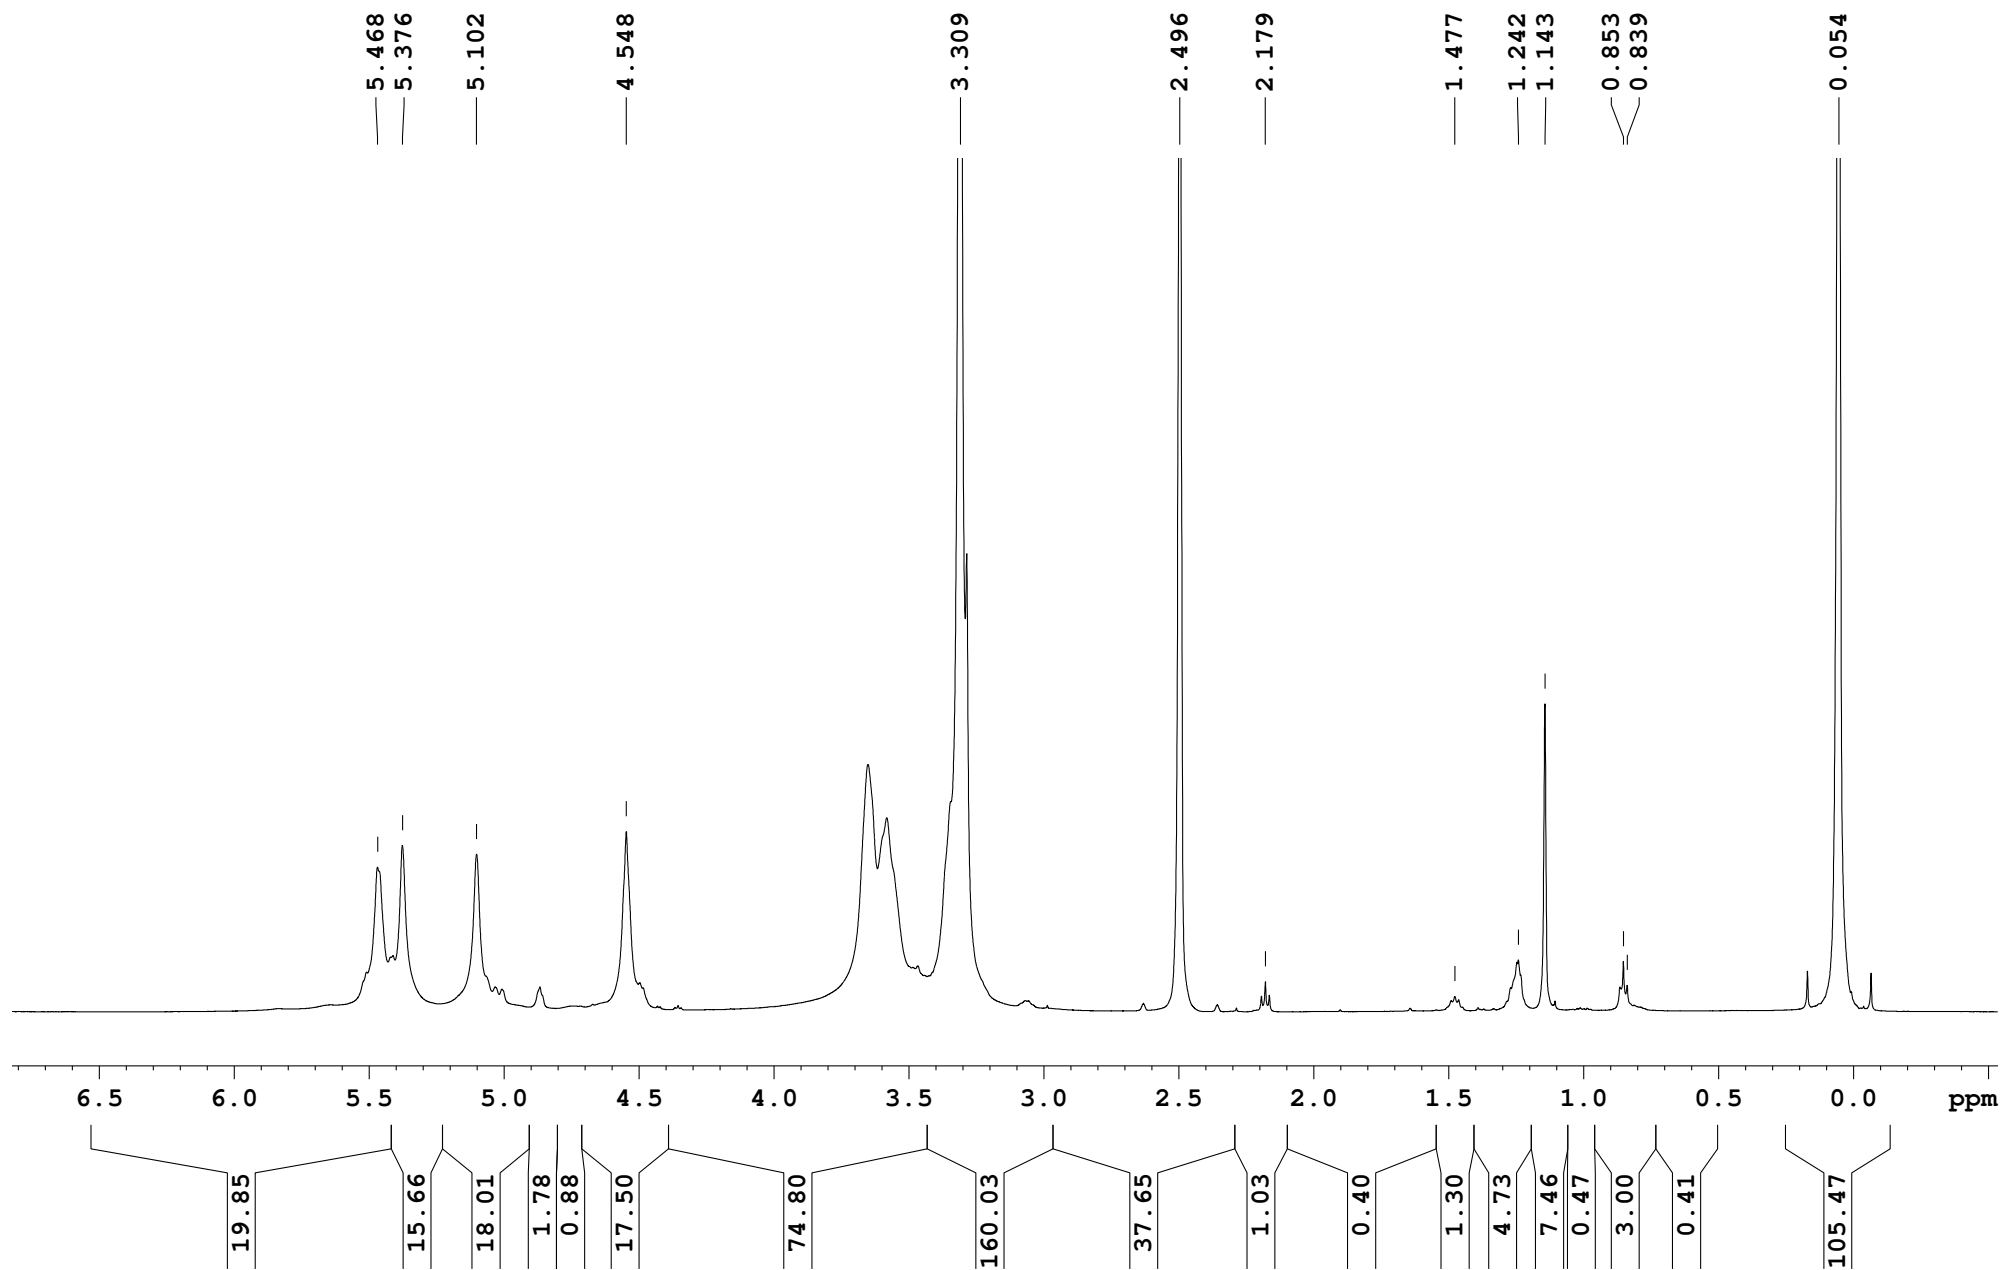

Supplement: s1 [file s1]
